# Supplementary material for: Functional Characterisation of Bile Metagenome: Study of Metagenomic Dark Matter
Source: MDPI journal article supplement (doi:10.3390/microorganisms9112201), 2021-10-21
Supplement: s1 [file s1]

**Supplementary Table S1.** Identification of antibiotic resistance genes (ARGs) in three gallbladder metagenome samples (H-04, H-05 and H-06) and a fosmid library mapped against Resfinder and Comprehensive Antibiotic Resistance Database (CARD). Accession codes as well as specific antibiotic resistance for each ARG are provided. ARGs abundance is calculated by dividing the number of ARGs conferring resistance to certain groups of antibiotics by the number of sequence megabases.

| Sample | Database        | Gene                                                            | Number of ARGs/Mb | Resistance                                                                                                                                                                  |
|--------|-----------------|-----------------------------------------------------------------|-------------------|-----------------------------------------------------------------------------------------------------------------------------------------------------------------------------|
| H-04   | CARD            | Erm(49)                                                         | 0.11              | Lincosamide, macrolide, streptogramin                                                                                                                                       |
| H-04   | CARD            | TEM-116                                                         | 0.11              | Cephalosporin, monobactam, penam, penem                                                                                                                                     |
| H-04   | CARD; Resfinder | tet(Q); tet(W)                                                  | 0.45              | Doxycycline, tetracycline, minocycline                                                                                                                                      |
| H-04   | Resfinder       | blaTEM-116                                                      | 0.11              | Amoxicillin, ampicillin, cephalothin, piperacillin, ticarcillin                                                                                                             |
| H-04   | Resfinder       | cat(pC194)                                                      | 0.11              | Chloramphenicol                                                                                                                                                             |
| H-05   | CARD            | APH(3')-IIa                                                     | 0.26              | Aminoglycoside                                                                                                                                                              |
| H-05   | CARD; Resfinder | Tet(O); tet(W); tet(W)                                          | 1.54              | Doxycycline, tetracycline, minocycline                                                                                                                                      |
| H-06   | Resfinder       | cat(pC194)                                                      | 3.18              | Chloramphenicol                                                                                                                                                             |
| Fosmid | CARD            | acrB; acrE; acrF; acrS; H-NS                                    | 0.38              | Cephalosporin, cephamycin, fluoroquinolone, glycylcycline, macrolide, penam, phenicol, rifamycin, tetracycline, triclosan                                                   |
| Fosmid | CARD            | acrD                                                            | 0.08              | Aminoglycoside                                                                                                                                                              |
| Fosmid | CARD            | baeR; baeS; cpxA; mdtA; mdtB; mdtC; tolC                        | 0.54              | Aminocoumarin, aminoglycoside, carbapenem, cephalosporin, cephamycin, fluoroquinolone, glycylcycline, macrolide, penam, penem, phenicol, rifamycin, tetracycline, triclosan |
| Fosmid | CARD            | catI                                                            | 0.08              | Phenicol                                                                                                                                                                    |
| Fosmid | CARD            | CRP; emrA; emrB; emrR; evgA; evgS; gadW; gadX; mdtE; mdtF; mdtH | 0.84              | Fluoroquinolone, macrolide, penam, tetracycline                                                                                                                             |
| Fosmid | CARD            | dfrA1                                                           | 0.08              | Diaminopyrimidine                                                                                                                                                           |
| Fosmid | CARD            | emrK; emrY                                                      | 0.15              | Tetracycline                                                                                                                                                                |
| Fosmid | CARD            | kdpE                                                            | 0.08              | Aminoglycoside                                                                                                                                                              |
| Fosmid | CARD            | marA                                                            | 0.08              | Carbapenem, cephalosporin, cephamycin, fluoroquinolone, glycylcycline, monobactam, penam, penem, phenicol, rifamycin, tetracycline, triclosan                               |
| Fosmid | CARD            | mdtG                                                            | 0.08              | Fosfomycin                                                                                                                                                                  |
| Fosmid | CARD            | mel                                                             | 0.08              | Lincosamide, macrolide, oxazolidinone, phenicol, pleuromutilin, streptogramin, tetracycline                                                                                 |
| Fosmid | CARD            | mphB                                                            | 0.08              | Macrolide                                                                                                                                                                   |
| Fosmid | CARD            | msbA                                                            | 0.08              | Nitroimidazole                                                                                                                                                              |
| Fosmid | Resfinder       | catA1                                                           | 0.08              | Chloramphenicol                                                                                                                                                             |
| Fosmid | Resfinder       | dfrA1                                                           | 0.08              | Trimethoprim                                                                                                                                                                |
| Fosmid | Resfinder       | mef(A)                                                          | 0.08              | Erythromycin, azithromycin                                                                                                                                                  |

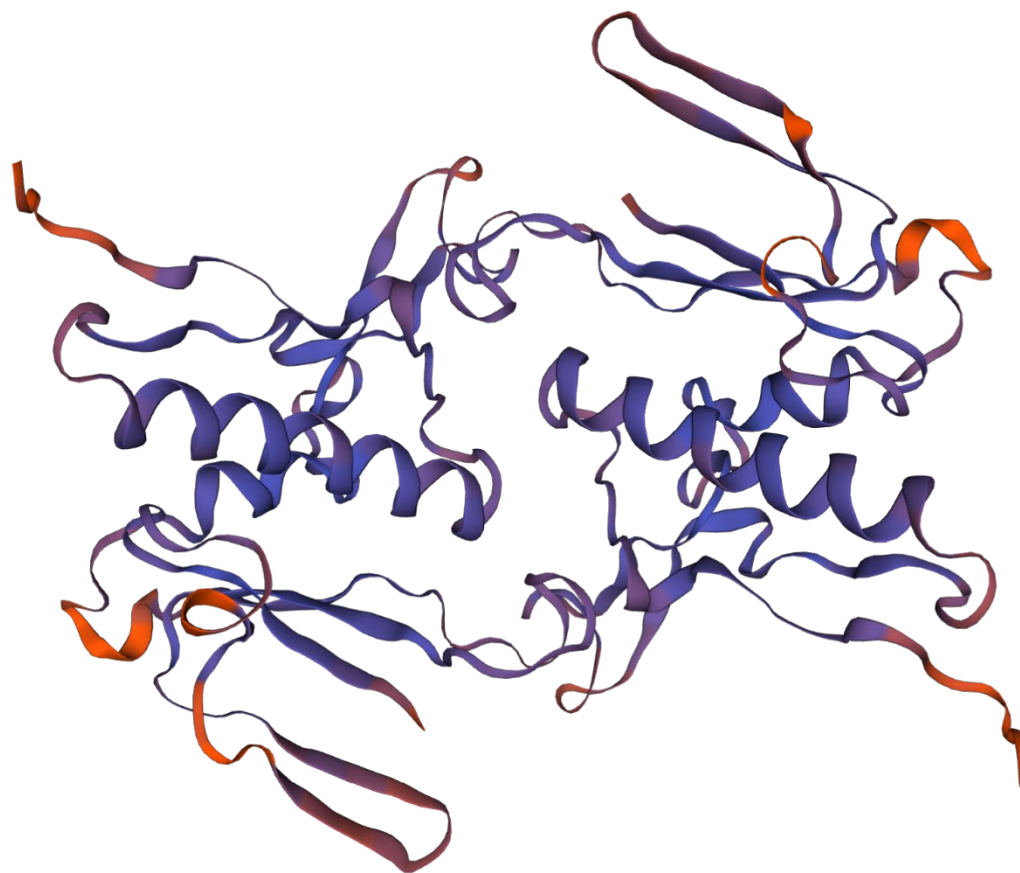

**Supplementary Figure S1.** Structural conformation of novel  $\beta$ -galactosidase 2 found in the metagenomic dark matter fraction of gut microbiota.

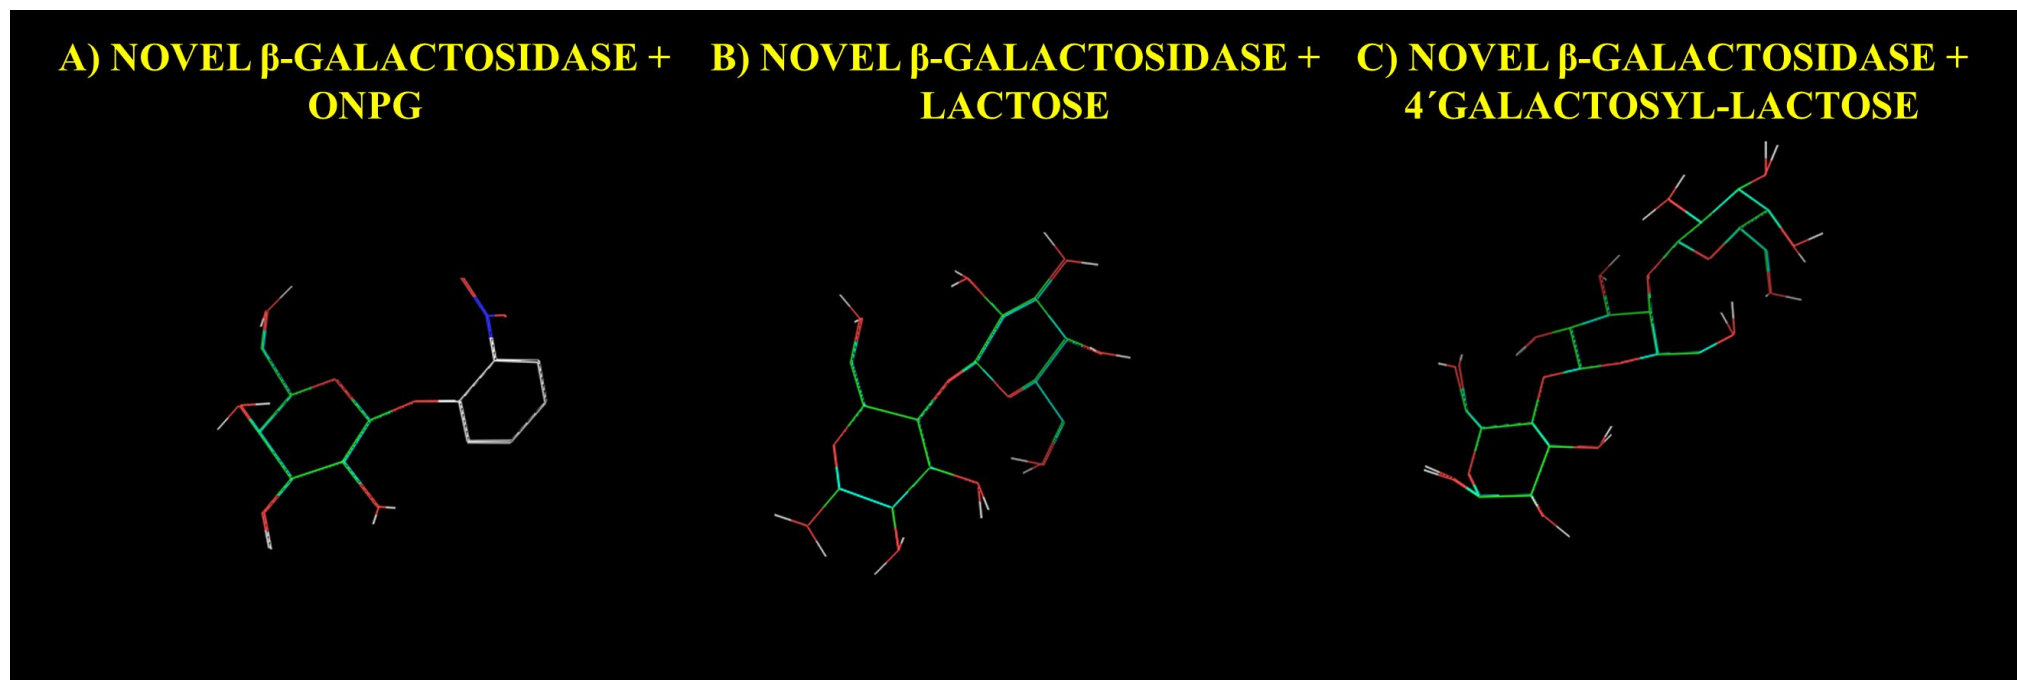

**Supplementary Figure S2.** Redocking results of novel  $\beta$ -galactosidase 2, annotated in the metagenomic dark matter fraction of gut metagenomes, to several substrates: A) ortho-nitrophenyl glucoside (ONPG), B) lactose, C) 4' galactosyl-lactose. The similarity between the docked and bound conformations of substrates in the enzyme structure is illustrated. Color codes are assigned to different atoms present in substrates: green (carbon), hydrogen (white), oxygen (red) and nitrogen (blue). It should be noted that this Figure illustrates the superimposition of two structures (docked and redocked). Superimposed docked and redocked conformation are very similar, highlighting the reproducibility of molecular docking simulations.
